# Supplementary material
Source: PubMed Central journal article supplement (PMC8711247)

## S1. Flow chart

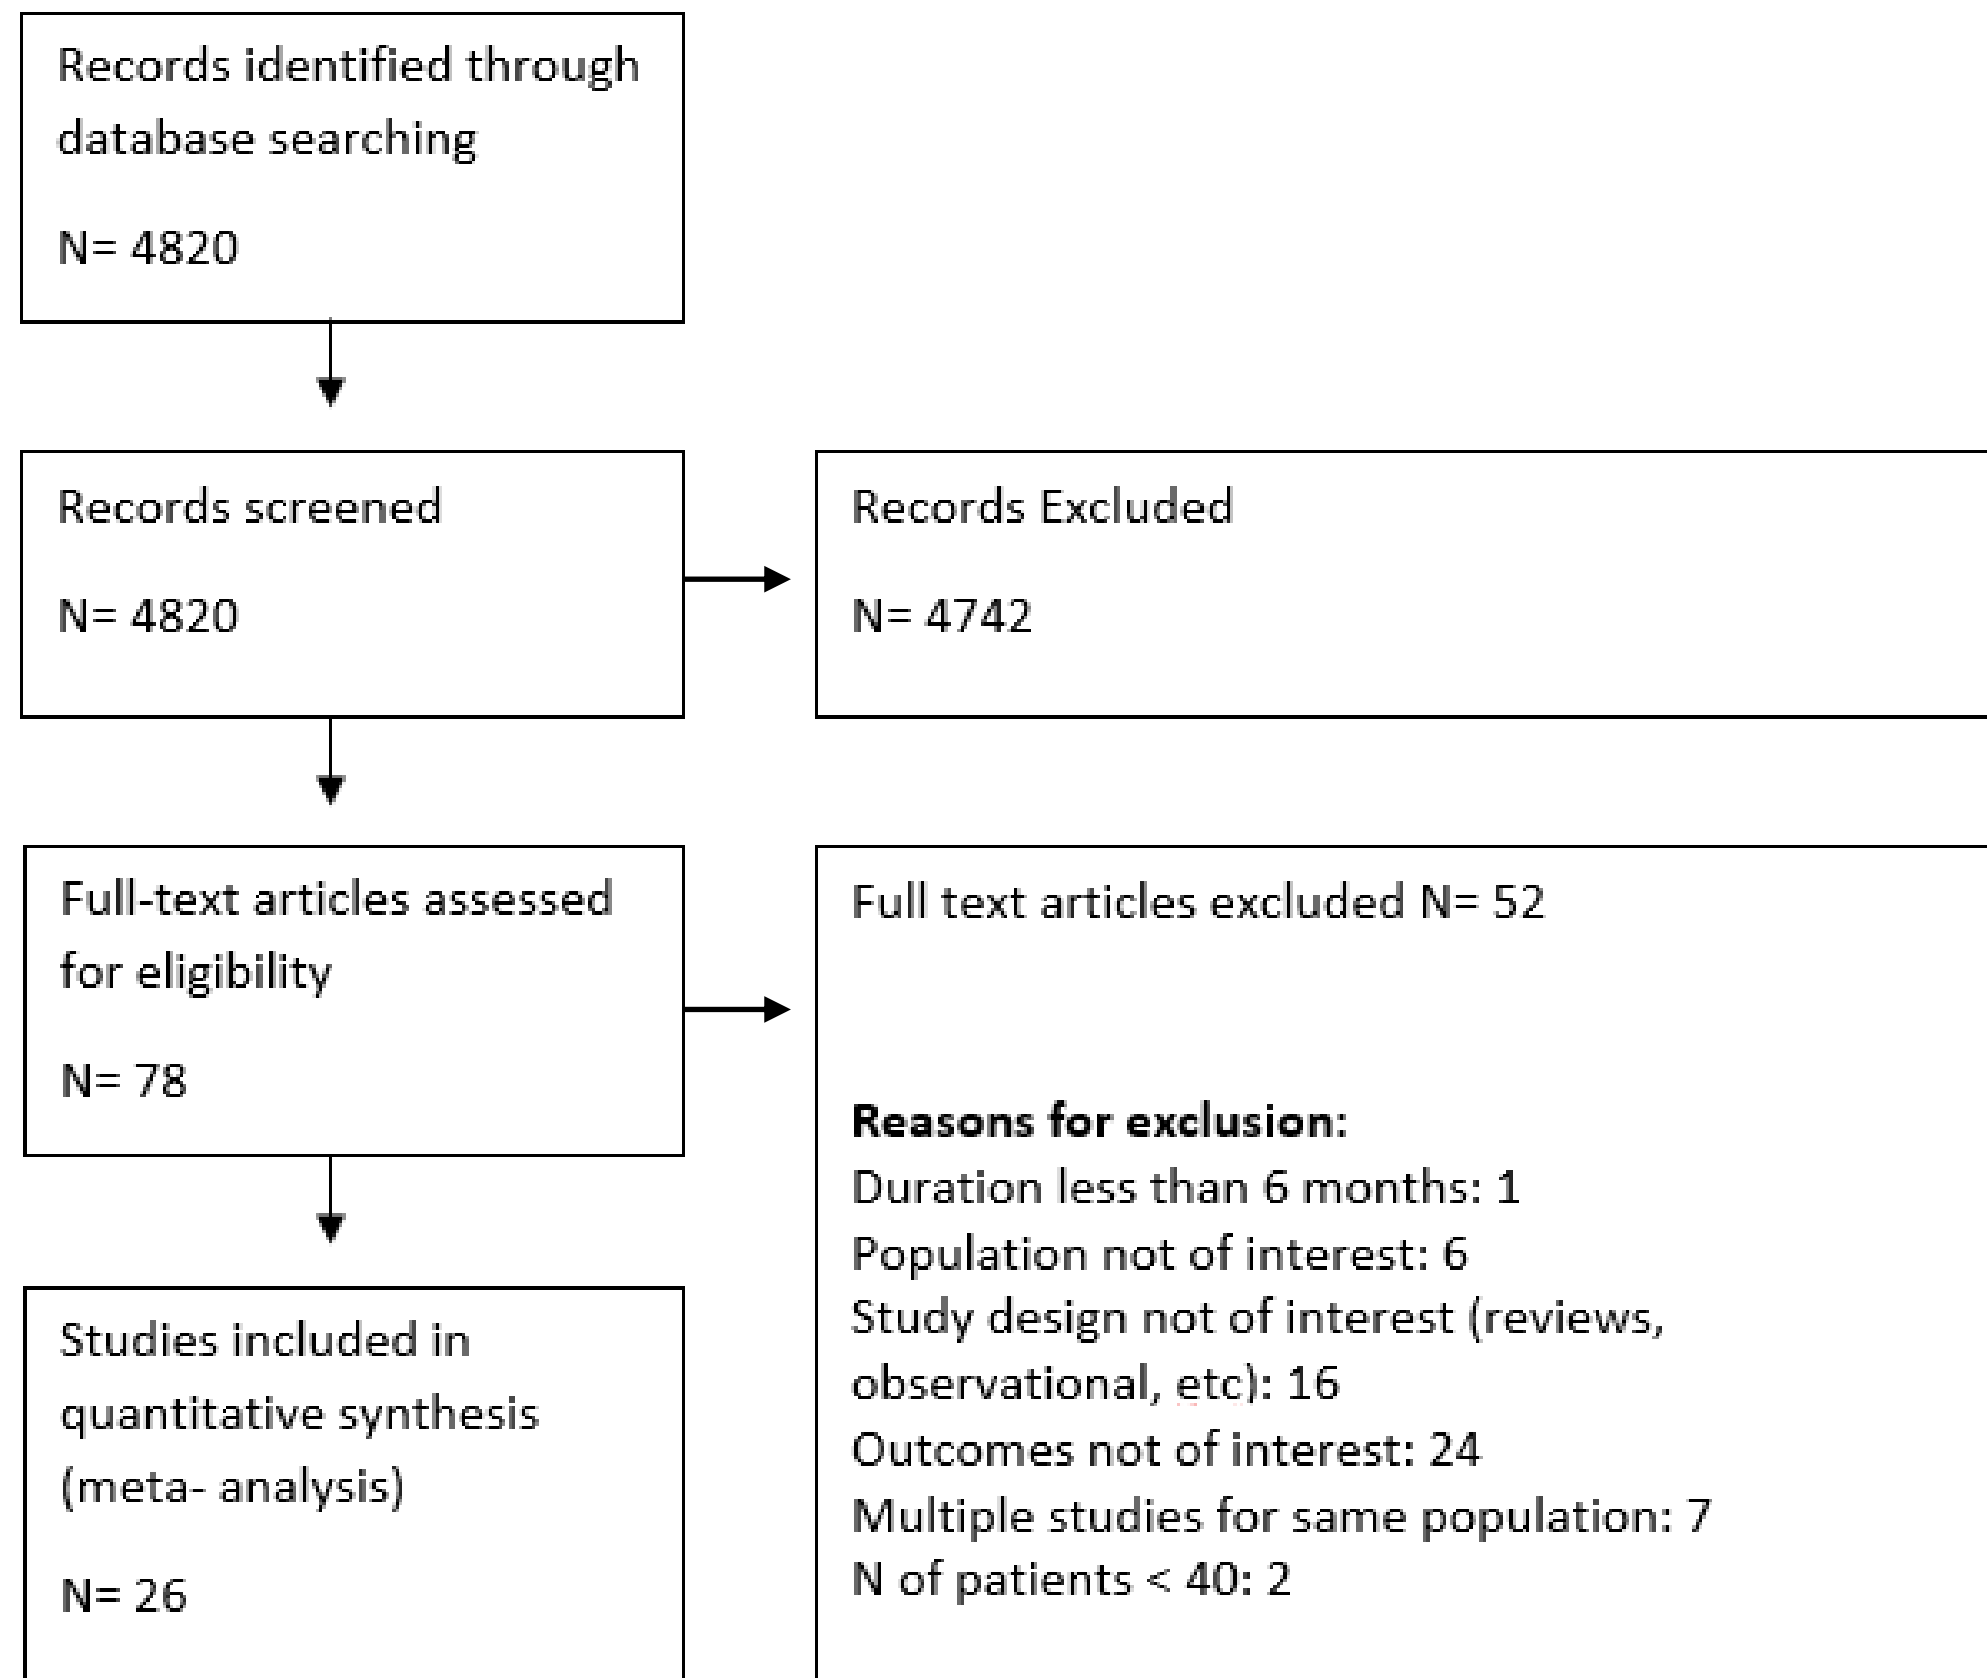

## S2. Direct comparisons for fibrosis improvement

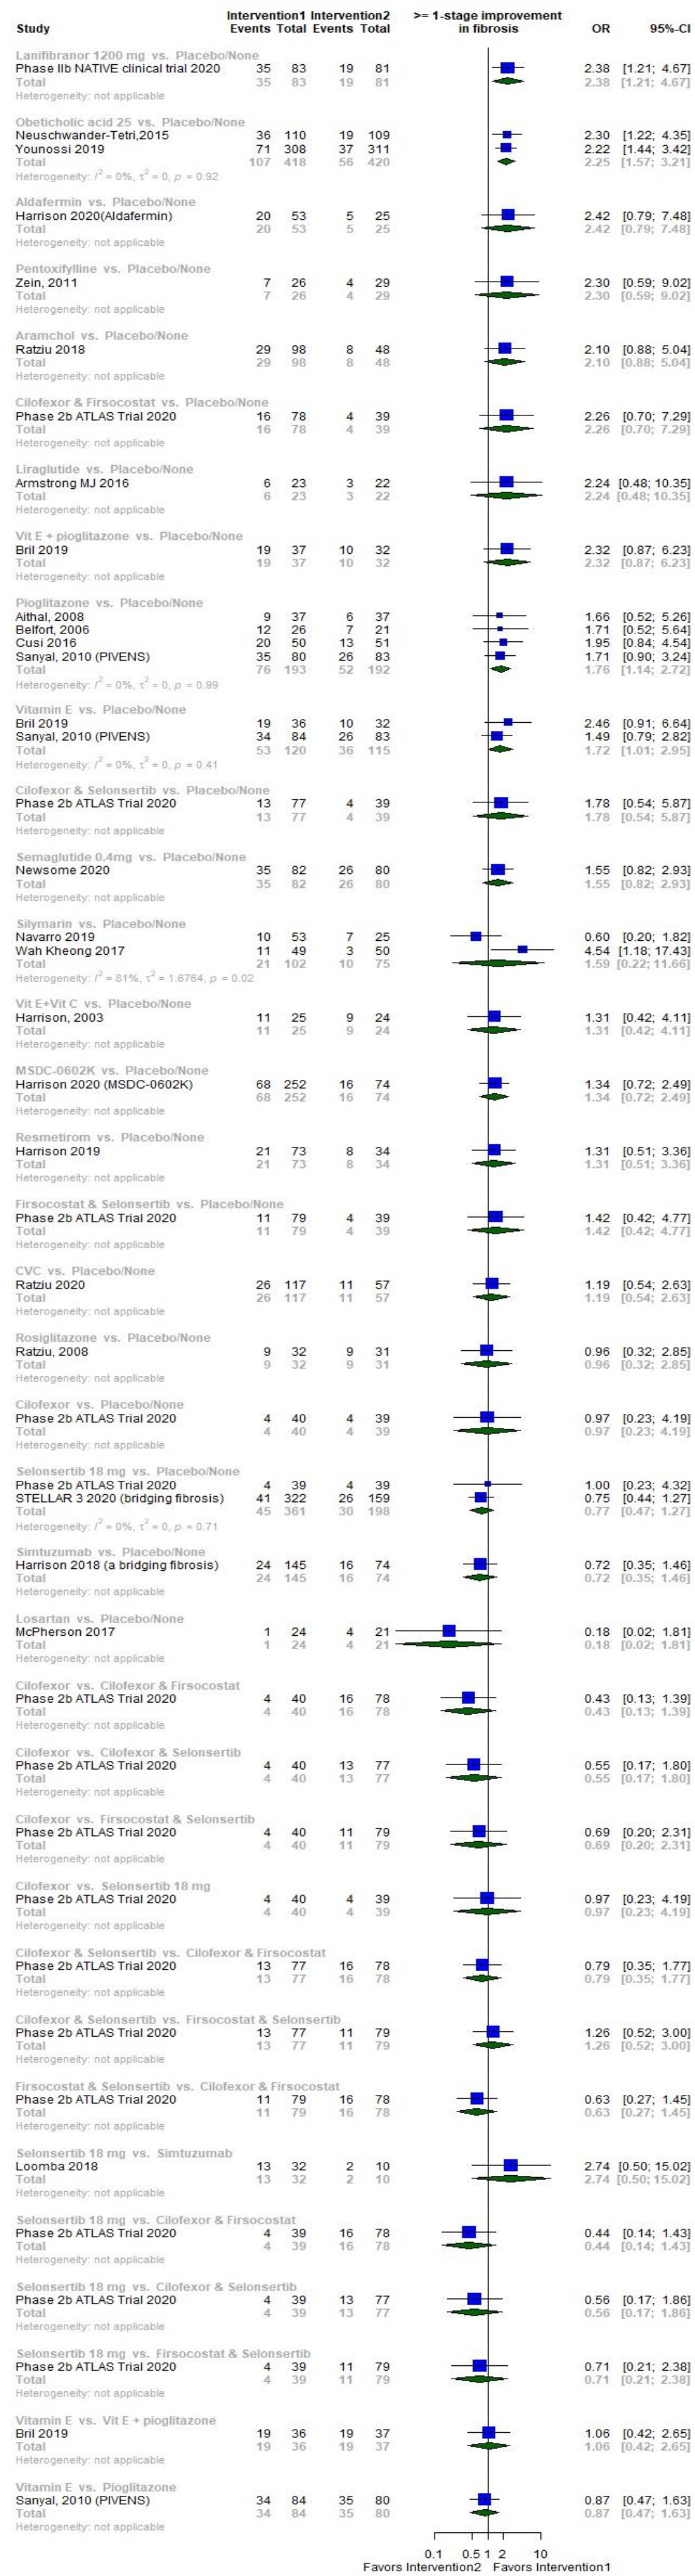

### S3. Rankogram for fibrosis improvement

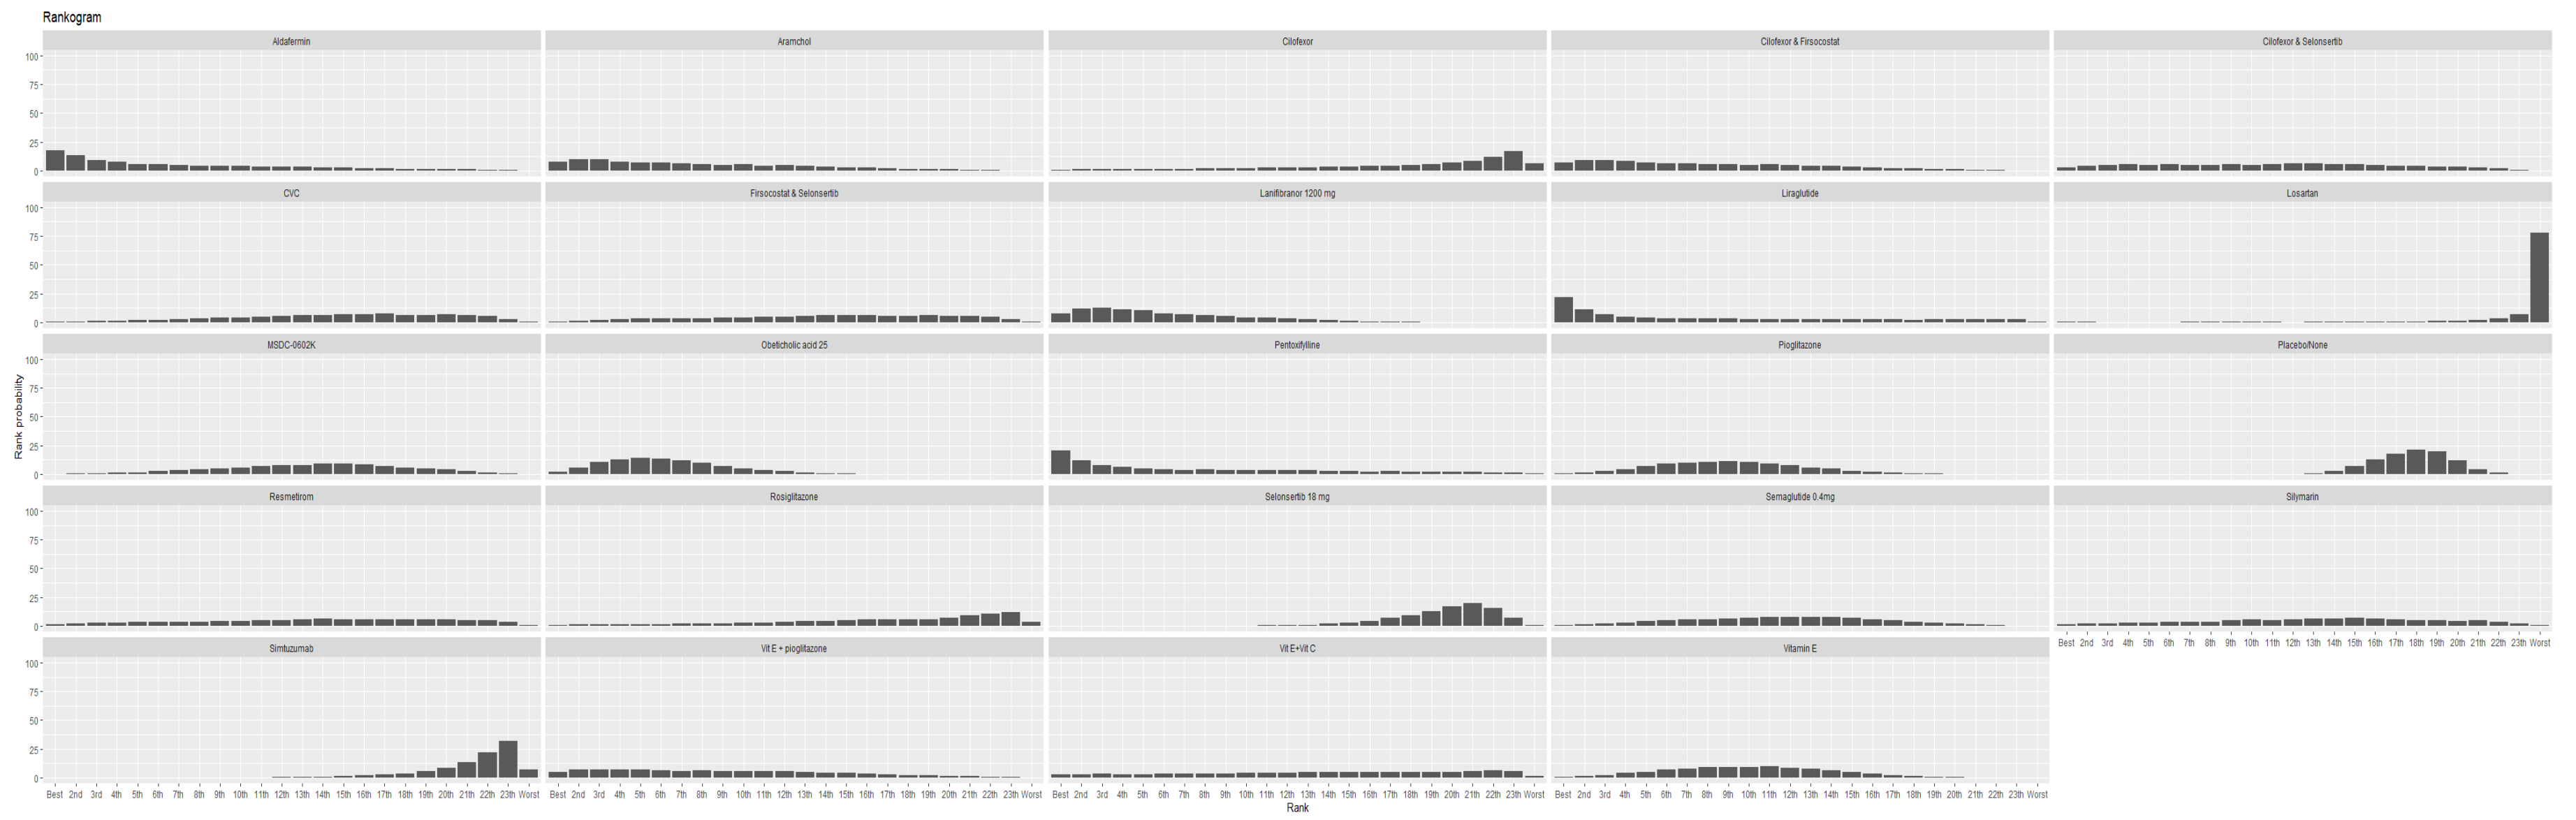



## S4. Direct comparisons for NASH resolution

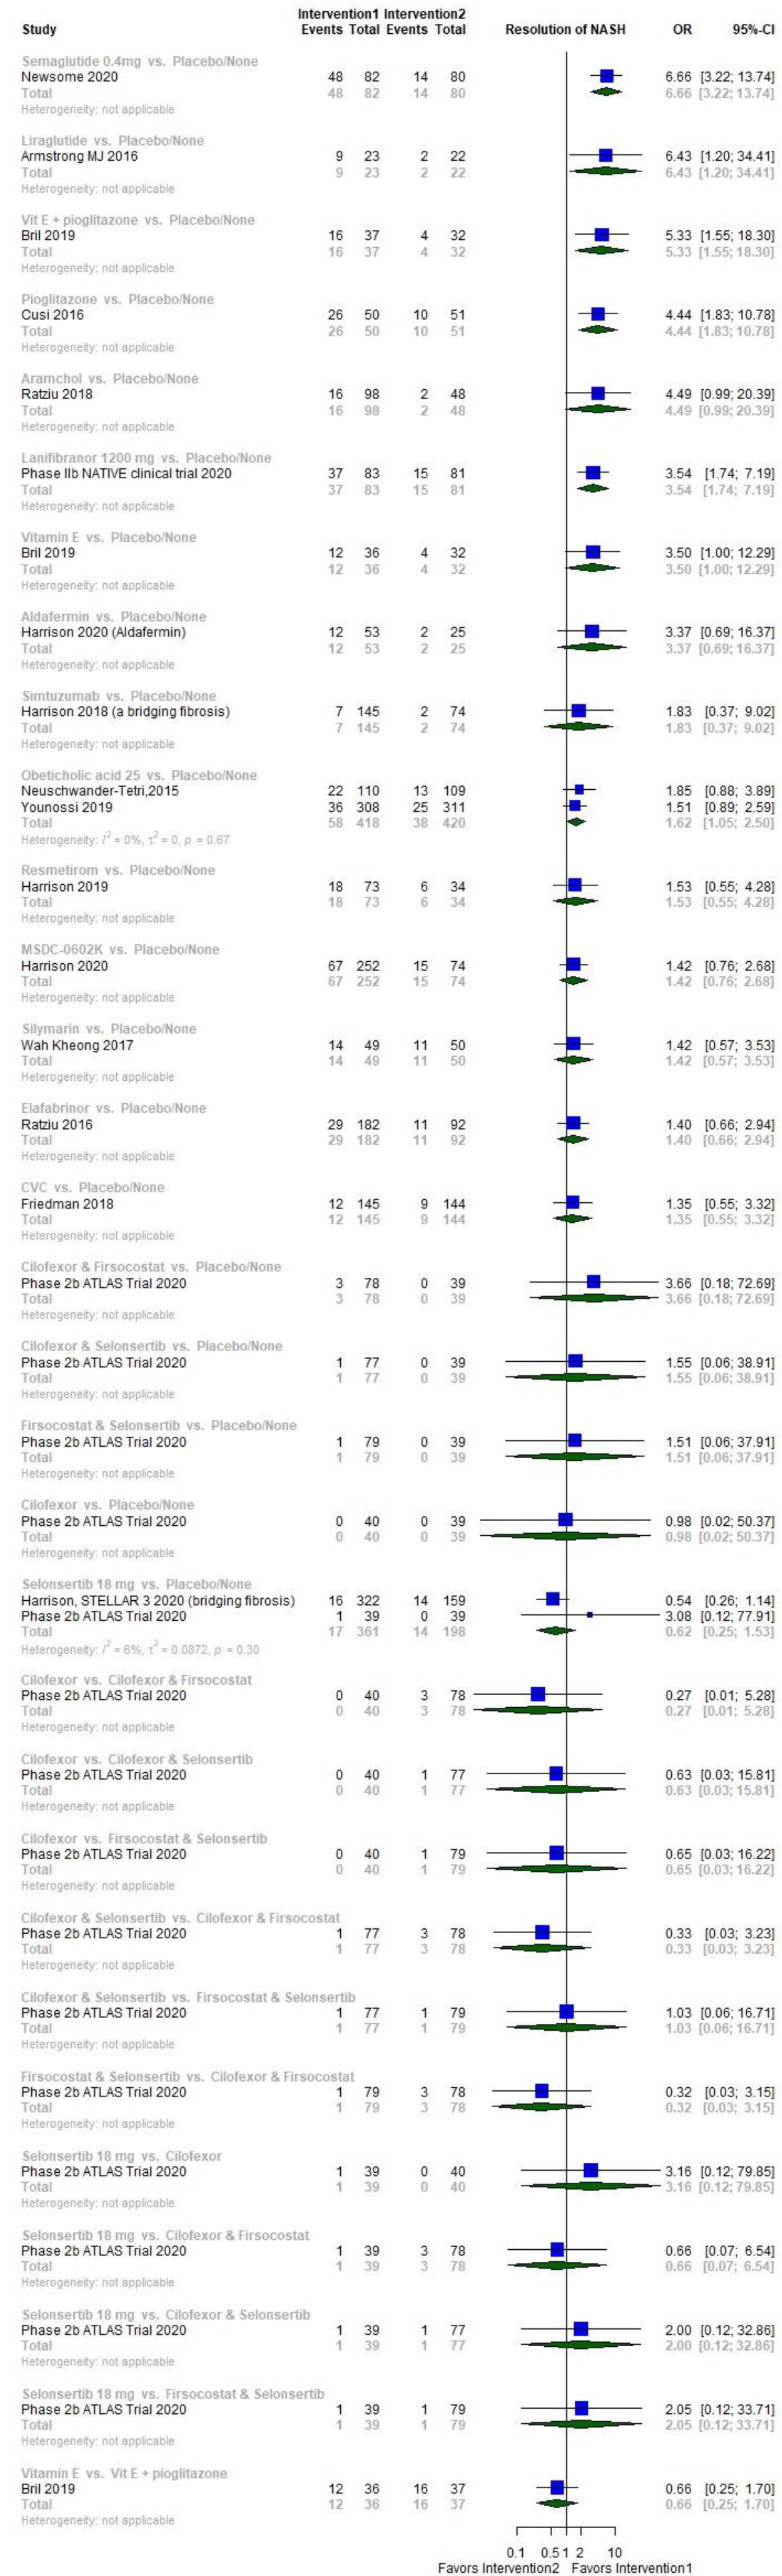



## S6. Direct and Indirect comparisons for fibrosis improvement

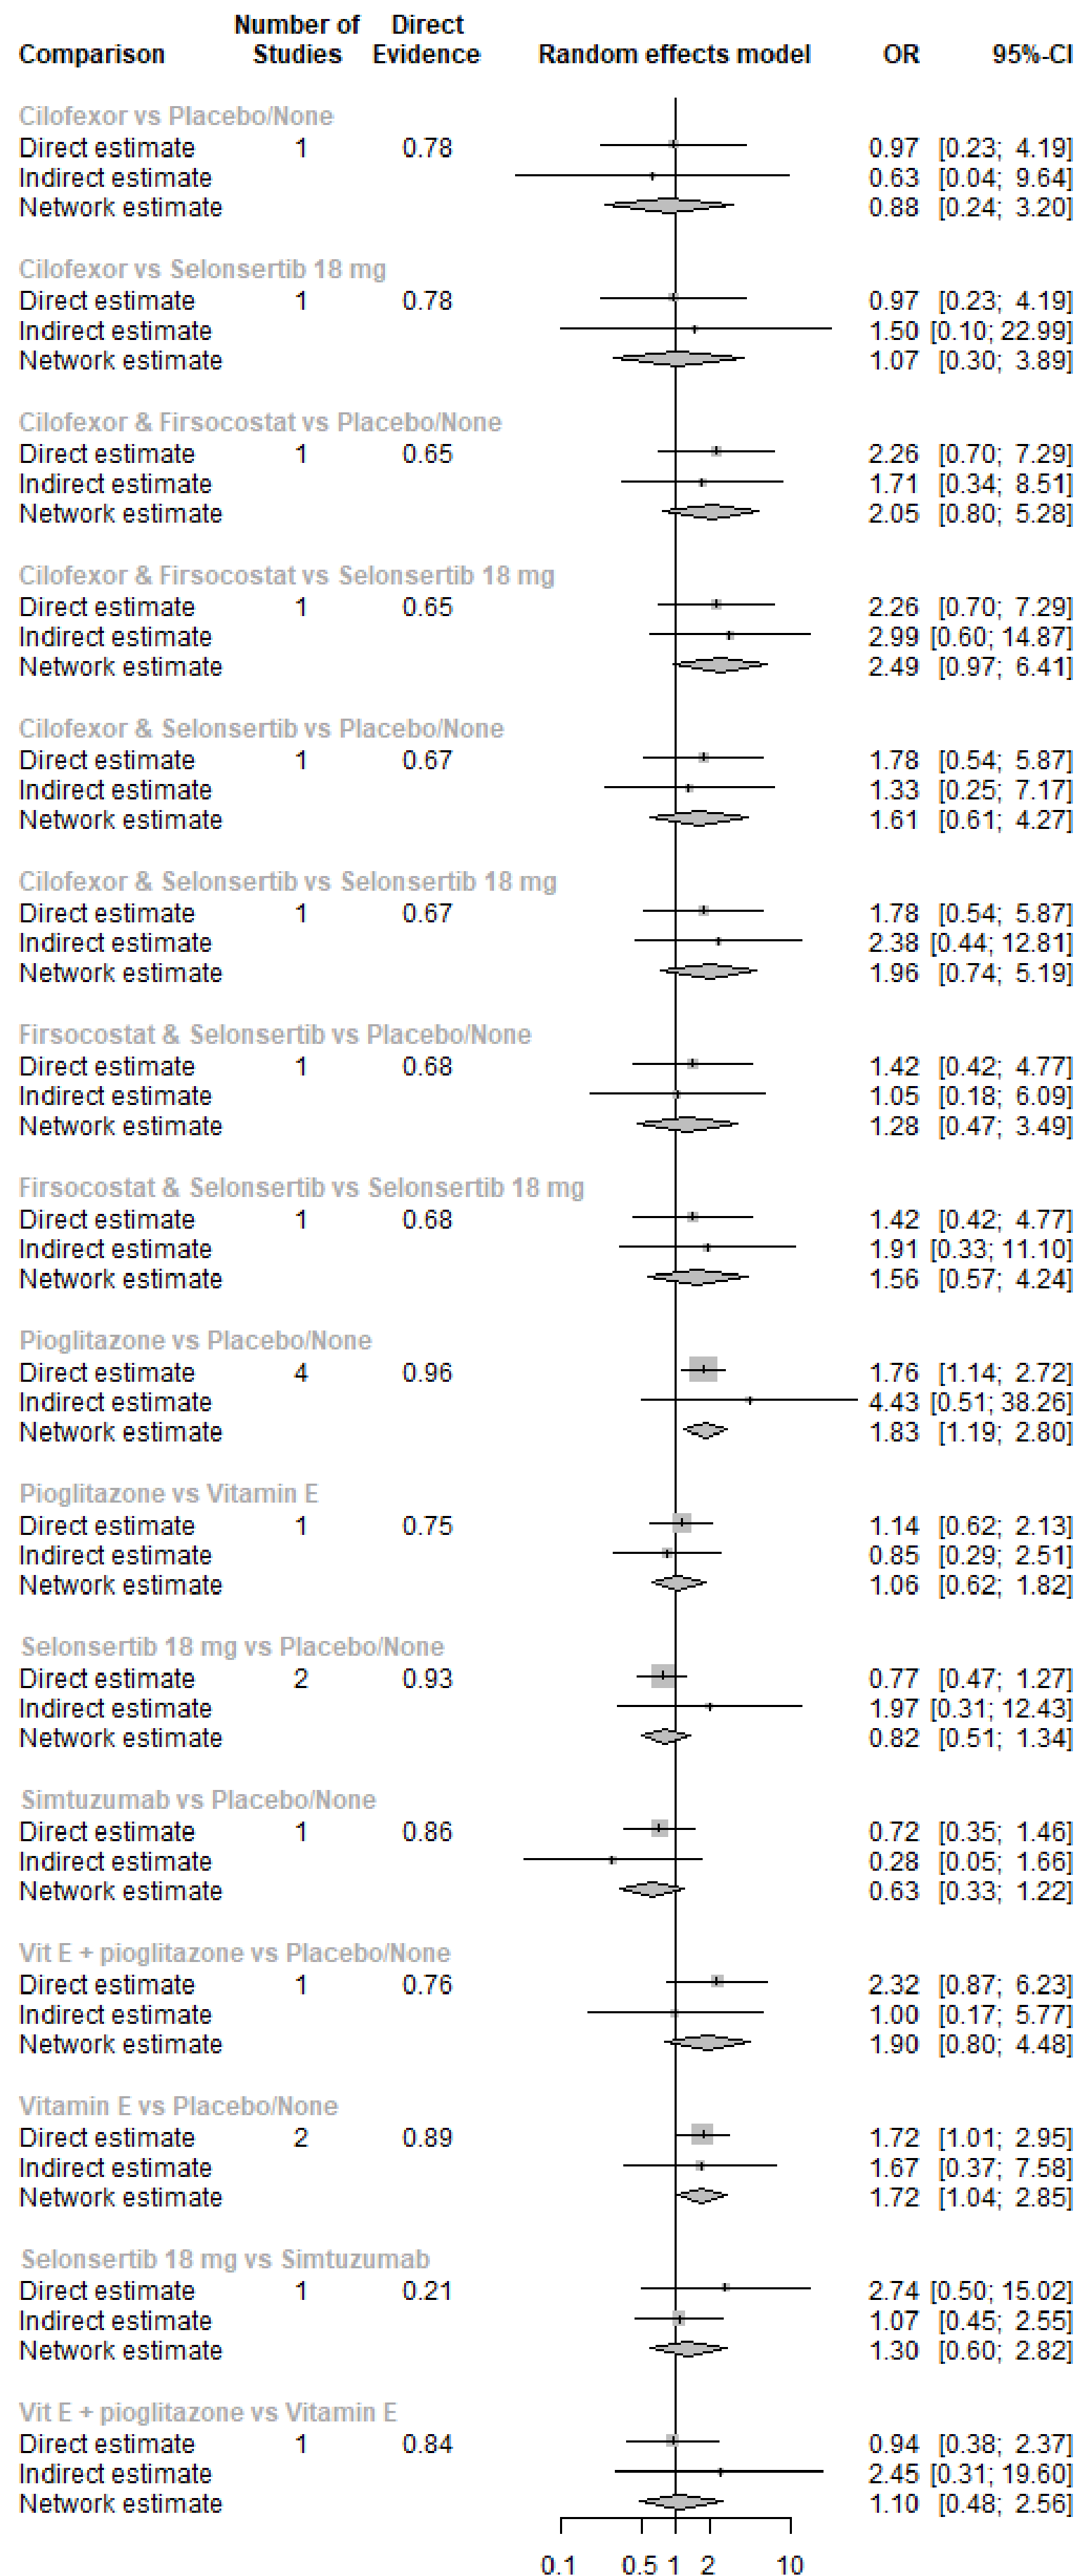

## S7. Direct and Indirect comparisons for NASH resolution

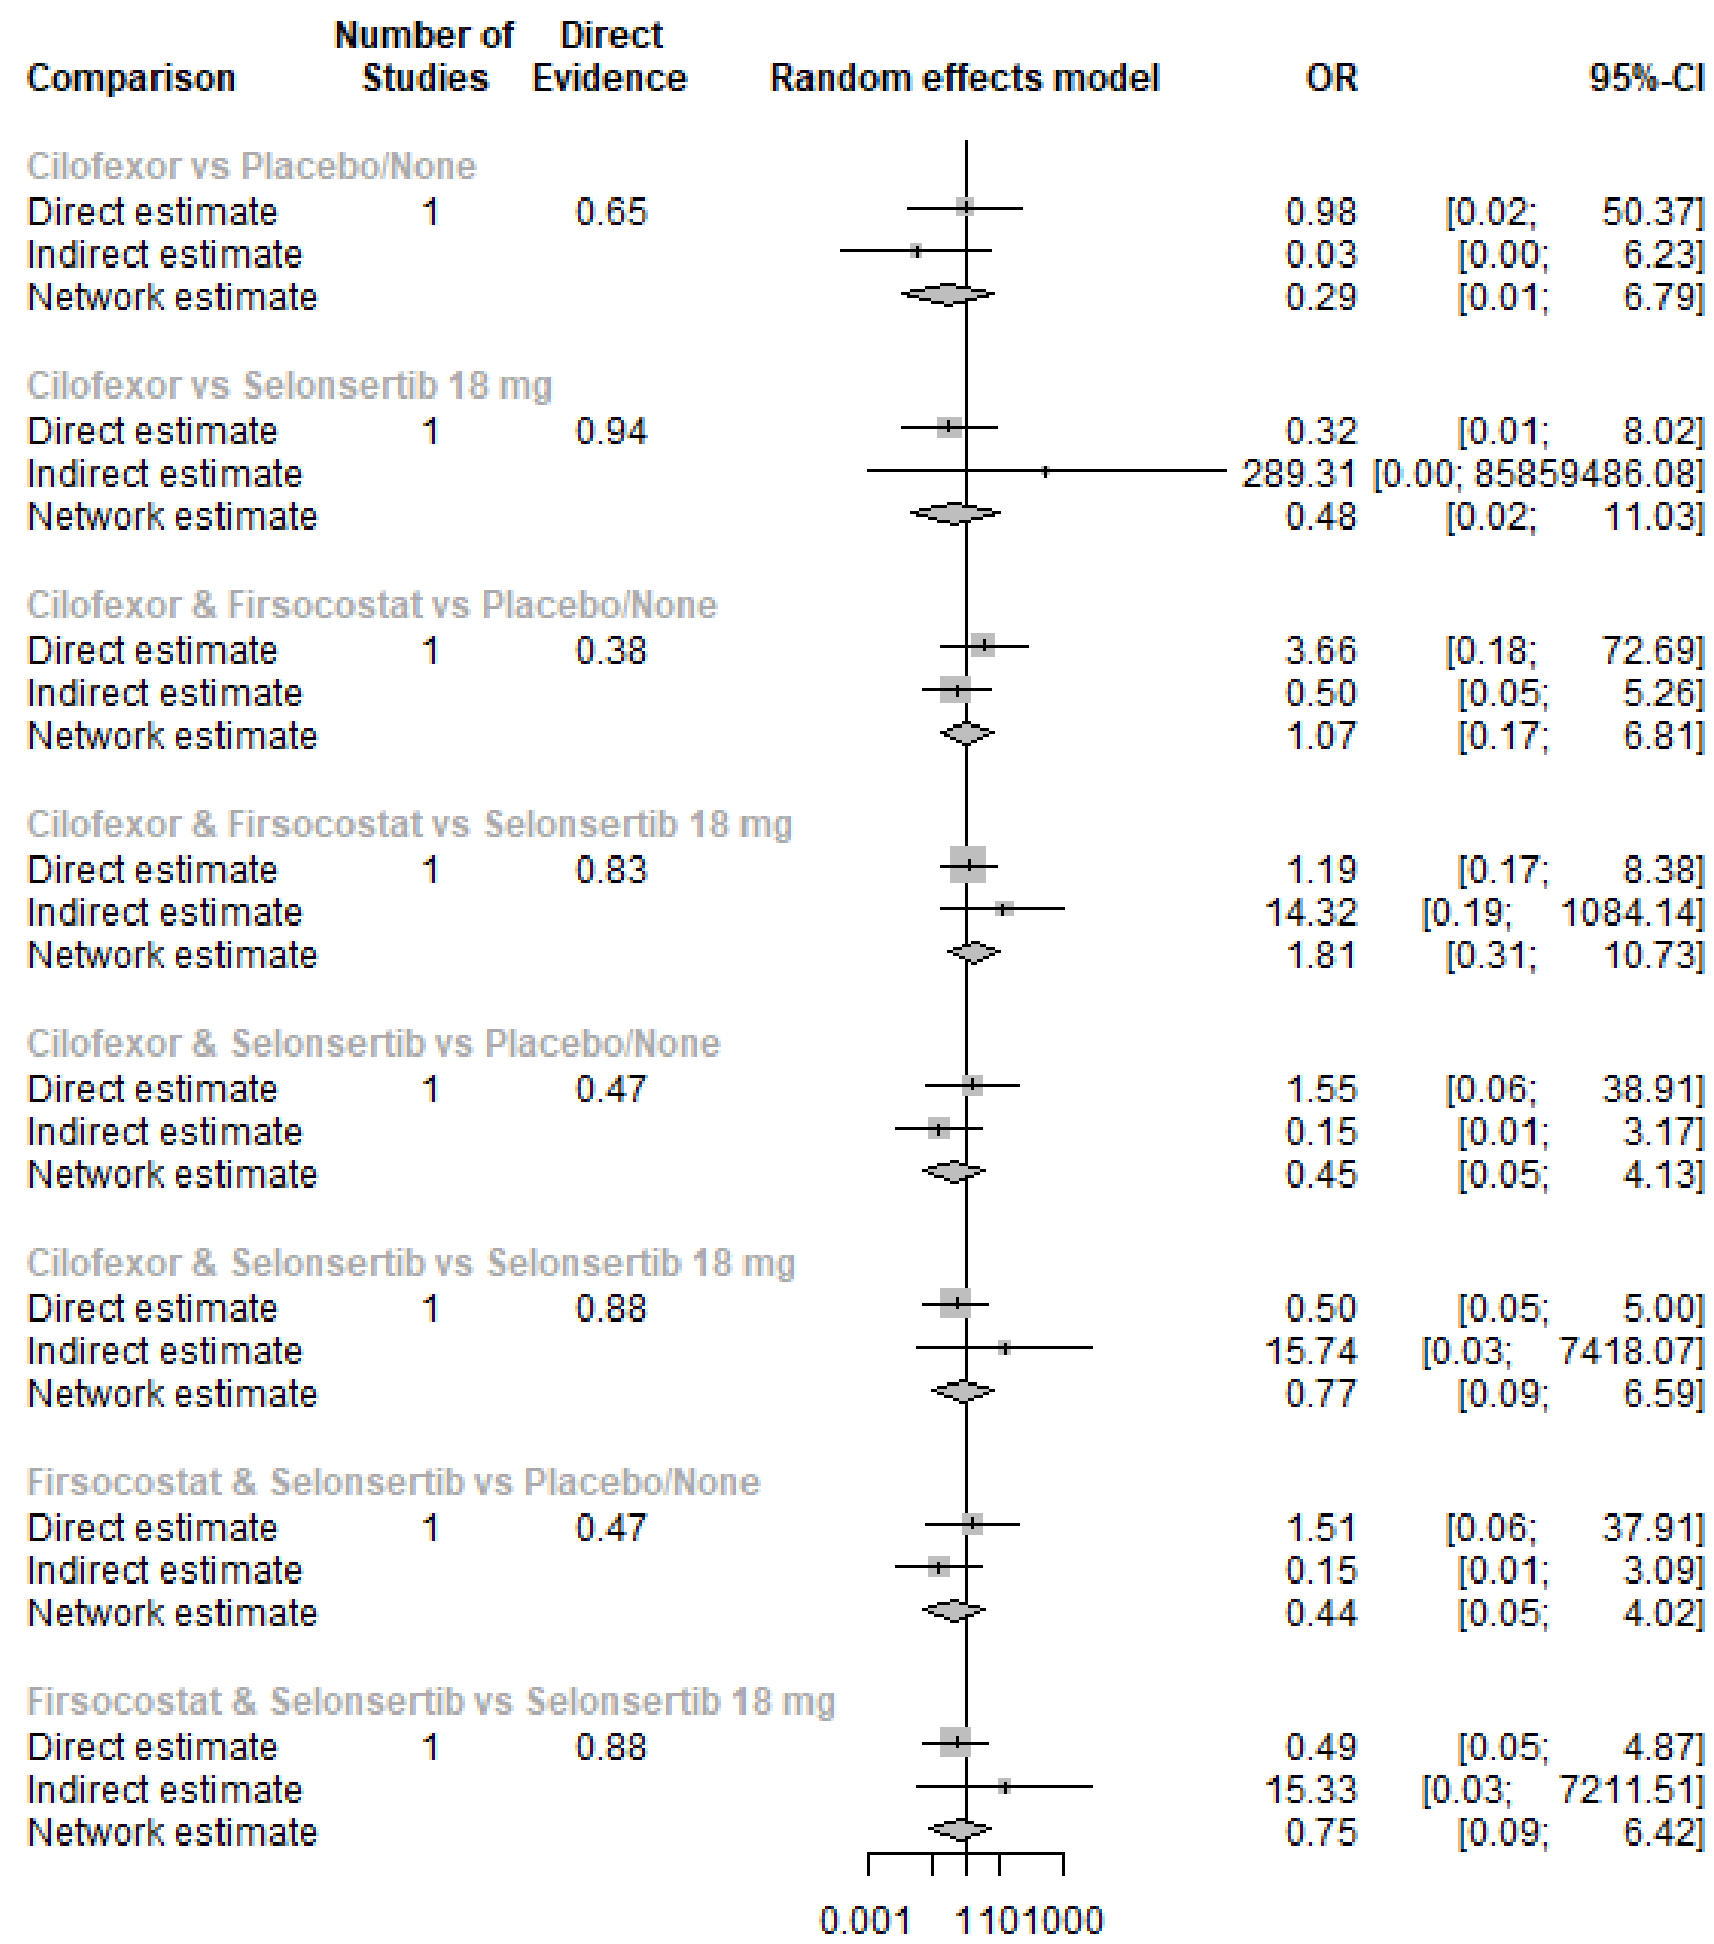

Supplement: NIHMS1733557-supplement-fS1-7.pdf [file NIHMS1733557-supplement-fS1-7.pdf]
