# Supplementary material
Source: PubMed Central journal article supplement (PMC8711247)
Supplement: NIHMS1733557-supplement-tS1-3.pdf [file NIHMS1733557-supplement-tS1-3.pdf]

**Table 1. Characteristics of included studies<sup>1</sup>.**

| Author, Year                         | Study Design | Study Location                     | Follow-up Duration | Intervention: N of patients                                                                                                                         | Control: N of patients | Concomitant Diet/Exercise                          | Concomitant Medications                                                                                                                                                               | Concern for conflict of interest          |
|--------------------------------------|--------------|------------------------------------|--------------------|-----------------------------------------------------------------------------------------------------------------------------------------------------|------------------------|----------------------------------------------------|---------------------------------------------------------------------------------------------------------------------------------------------------------------------------------------|-------------------------------------------|
| Aithal, 2008                         | RCT, MC      | UK                                 | 52 Weeks           | Pioglitazone 30 mg/d<br>N: 37                                                                                                                       | Placebo<br>N: 37       | Hypocaloric diet (500 kcal less), 53/week exercise | None                                                                                                                                                                                  | Low                                       |
| Armstrong MJ, 2016                   | RCT, MC      | UK                                 | 48 Weeks           | Liraglutide subcutaneously 1.8 mg daily<br>N: 26                                                                                                    | Placebo<br>N: 26       | NR                                                 | NR                                                                                                                                                                                    | High (partial funding by Novo Nordisk)    |
| Belfort, 2006                        | RCT, MC      | USA                                | 26 Weeks           | Pioglitazone 45 mg/d<br>N: 26                                                                                                                       | Placebo<br>N: 21       | Hypocaloric diet (500 kcal less)                   | None                                                                                                                                                                                  | Low                                       |
| Bril, 2019                           | RCT, MC      | USA                                | 78 Weeks           | Intervention 1: Vitamin E 400 BID<br>N: 36<br><br>Intervention 2: Vitamin E 400 BID plus pioglitazone 45 mg/d<br>N:37                               | Placebo<br>N: 32       | Lifestyle modification education                   | NR                                                                                                                                                                                    | Low                                       |
| Cusi, 2016                           | RCT, SC      | USA                                | 78 Weeks           | Pioglitazone 30 mg/d (titrated after 2 months to 45 mg/d)<br>N: 50                                                                                  | Placebo<br>N: 51       | Lifestyle counseling and a hypocaloric diet        | NR                                                                                                                                                                                    | Low                                       |
| Harrison, 2018 (a bridging fibrosis) | RCT, MC      | USA, France, Switzerland and Spain | 96 Weeks           | Intervention 1: Simtuzumab 75mg /week subcutaneous injection<br>N: 74<br><br>Intervention 2: Simtuzumab 125 mg/week subcutaneous injection<br>N: 74 | Placebo<br>N: 74       | NR                                                 | NR                                                                                                                                                                                    | High (Funded by Gilead Sciences)          |
| Harrison, 2003                       | RCT, SC      | USA                                | 26 Weeks           | Vitamin E (1000 IU/d) plus Vitamin C (1,000 mg/d)<br>N: 25                                                                                          | Placebo<br>N: 24       | NHLBI 1,600 cal and written exercise plan          | NR                                                                                                                                                                                    | Low                                       |
| Harrison, 2019                       | RCT, MC      | USA                                | 36 Weeks           | Resmetirom 80 mg daily<br>N: 84                                                                                                                     | Placebo<br>N: 41       | NR                                                 | Intervention group: PPI 39% , Statin 23%, Metformin 33%, Insulin 8%, ACEI 19%, Platelet aggregation inhibitors 20%<br><br>Placebo group: PPI 24% , Statin 10%, Metformin 24%, Insulin | High (Funded by Madrigal Pharmaceuticals) |

<sup>1</sup> RCT: Randomized Controlled Trial; MC: Multicenter; SC: Single center; NR: Not reported; NHLBI: National Heart, Lung, and Blood Institute; PPI: Proton Pump Inhibitors; ACEI: Angiotensin-converting-enzyme inhibitors; BID, Two Times a day; TID: Three Times a Day

| Author, Year                                 | Study Design | Study Location | Follow-up Duration | Intervention: N of patients                                                                                                                                                        | Control: N of patients                                      | Concomitant Diet/Exercise                                                          | Concomitant Medications                                             | Concern for conflict of interest                                    |
|----------------------------------------------|--------------|----------------|--------------------|------------------------------------------------------------------------------------------------------------------------------------------------------------------------------------|-------------------------------------------------------------|------------------------------------------------------------------------------------|---------------------------------------------------------------------|---------------------------------------------------------------------|
|                                              |              |                |                    |                                                                                                                                                                                    |                                                             |                                                                                    | 7%, ACEI 24%, Platelet aggregation inhibitors 10%                   |                                                                     |
| Harrison, 2020 (MSDC-0602K)                  | RCT, MC      | USA            | 52 Weeks           | Intervention 1: MSDC-0602K dose 62.5 mg daily<br>N: 102<br><br>Intervention 2: MSDC-0602K dose 125 mg daily<br>N: 99<br><br>Intervention 3: MSDC-0602K dose 250 mg daily<br>N: 101 | Placebo<br>N: 100                                           | None                                                                               | None                                                                | High (Funded by Cirius Therapeutics)                                |
| Harrison, 2020 (Aldafermin)                  | RCT, MC      | USA            | 24 Weeks           | Aldafermin 1 mg daily by subcutaneous injection<br>N:53                                                                                                                            | Placebo<br>N:25                                             | NR                                                                                 | Intervention group: Statin 20 (38%)<br>Placebo group statin 5 (20%) | High (Funding for this study is provided by NGM Biopharmaceuticals) |
| Harrison, STELLAR 3 2020 (bridging fibrosis) | RCT, MC      | 26 countries   | 48 Weeks           | Intervention 1: Selonsertib 18 mg daily<br>N: 322<br><br>Intervention 2: Selonsertib 6 mg daily<br>N: 321                                                                          | Placebo<br>N: 159                                           | NR                                                                                 | NR                                                                  | High (Funded by Gilead Sciences)                                    |
| Loomba, 2018                                 | RCT, MC      | USA            | 24 Weeks           | Selonsertib 18 mg daily +\- Simtuzumab self-subcutaneous injection once weekly<br>N: 32                                                                                            | Simtuzumab self-subcutaneous injection once weekly<br>N: 10 | NR                                                                                 | NR                                                                  | High (Multiple grants from pharmaceutical companies)                |
| McPherson, 2017                              | RCT, MC      | England        | 104 Weeks          | Losartan 50 mg daily<br>N: 24                                                                                                                                                      | Placebo<br>N: 21                                            | Standard advice with regard to diet, exercise and weight maintenance.              | NR                                                                  | Low                                                                 |
| Navarro, 2019                                | RCT, MC      | USA            | 48 Weeks           | Silymarin TID<br>N: 53<br>(26 pts 420 mg, 27 pts 700 mg)                                                                                                                           | Placebo<br>N: 25                                            | Education about healthy diet and lifestyle                                         | NR                                                                  | High (Some of the authors work in pharmaceutical companies)         |
| Neuschwander-Tetri, 2015                     | RCT, MC      | USA            | 72 Weeks           | Obeticholic acid 25 mg daily<br>N: 141                                                                                                                                             | Placebo<br>N: 142                                           | Standardized recommendations on healthy eating habits, weight reduction, exercise, | None                                                                | Low                                                                 |
| Newsome, 2020                                | RCT, MC      | 16 Countries   | 72 Weeks           | Semaglutide 0.4 mg daily<br>N: 82                                                                                                                                                  | Placebo<br>N: 80                                            | NR                                                                                 | NR                                                                  | High (Sponsored by Novo Nordisk)                                    |

| Author, Year                        | Study Design | Study Location                                  | Follow-up Duration | Intervention: N of patients                                                                                                                                                                                                                                                                                                       | Control: N of patients | Concomitant Diet/Exercise                             | Concomitant Medications | Concern for conflict of interest |
|-------------------------------------|--------------|-------------------------------------------------|--------------------|-----------------------------------------------------------------------------------------------------------------------------------------------------------------------------------------------------------------------------------------------------------------------------------------------------------------------------------|------------------------|-------------------------------------------------------|-------------------------|----------------------------------|
| Loomba (Phase 2b ATLAS trial), 2020 | RCT, MC      | Multiple Countries                              | 48 Weeks           | <p>Intervention 1: Cilofexor 30 mg daily<br/>N: 40</p> <p>Intervention 2: Firsocostat 20 mg daily<br/>N: 40</p> <p>Inter3: Selonsertib 18 mg daily<br/>N: 39</p> <p>Inter4: Cilofexor &amp; Selonsertib<br/>N: 77</p> <p>Inter5: Firsocostat &amp; Selonsertib<br/>N: 79</p> <p>Inter6: Cilofexor &amp; Firsocostat<br/>N: 78</p> | Placebo<br>N: 39       | NR                                                    | NR                      | High (Funded by Gilead Sciences) |
| Phase 2b NATIVE trial, 2020         | RCT, MC      | Multiple Countries                              | 24 Weeks           | <p>Intervention 1: Lanifibranor 800 mg daily<br/>N: 83</p> <p>Intervention 2: Lanifibranor 1200 mg daily<br/>N: 83</p>                                                                                                                                                                                                            | Placebo<br>N: 81       | NR                                                    | NR                      | High (Funded by Inventiva)       |
| Ratziu, 2008                        | RCT, SC      | France                                          | 52 Weeks           | Rosiglitazone 4 mg/d for 1 month, then 8 mg/day<br>N: 32                                                                                                                                                                                                                                                                          | Placebo<br>N: 31       | Healthy eating and twice weekly exercise (details NR) | None                    | Low                              |
| Ratziu 2016                         | RCT, MC      | USA and 8 European countries                    | 52 Weeks           | <p>Intervention 1: Elafibranor 80 mg daily<br/>N: 93</p> <p>Intervention 2: Elafibranor 120 mg daily<br/>N: 91</p>                                                                                                                                                                                                                | Placebo<br>N: 92       | NR                                                    | None                    | High (Funded by GENFIT)          |
| Ratziu 2018                         | RCT, MC      | 11 countries from USA, Europe and Latin America | 52 Weeks           | Intervention 1: Aramchol 400 mg daily<br>N: 101                                                                                                                                                                                                                                                                                   | Placebo<br>N: 48       | NR                                                    | NR                      | Unclear                          |

| Author, Year                               | Study Design | Study Location                                                      | Follow-up Duration          | Intervention: N of patients                                                                      | Control: N of patients | Concomitant Diet/Exercise             | Concomitant Medications                                                                                                                                                                                                                                                                                                     | Concern for conflict of interest                     |
|--------------------------------------------|--------------|---------------------------------------------------------------------|-----------------------------|--------------------------------------------------------------------------------------------------|------------------------|---------------------------------------|-----------------------------------------------------------------------------------------------------------------------------------------------------------------------------------------------------------------------------------------------------------------------------------------------------------------------------|------------------------------------------------------|
|                                            |              |                                                                     |                             | Intervention 2: Aramchol<br>600 mg daily<br>N: 98                                                |                        |                                       |                                                                                                                                                                                                                                                                                                                             |                                                      |
| Ratzu, 2020<br>Friedman, 2018 <sup>2</sup> | RCT, MC      | 81 sites across the United States, Australia, Hong Kong, and Europe | 104 Weeks                   | Cenicriviroc (CVC)<br>150 mg daily<br>N: 145                                                     | Placebo<br>N: 72       | NR                                    | HMG CoA reductase inhibitors 35.4%, Biguanides 52.8 %,Angiotensin II inhibitors 22.9 %, Glucose lowering drugs excluding insulin 16.7%                                                                                                                                                                                      | High (Funded by tobira therapeutics)                 |
| Sanyal, 2010 (PIVENS)                      | RCT, MC      | USA                                                                 | 96 Weeks                    | Intervention 1: Pioglitazone<br>30 mg/d<br>N: 80<br><br>Intervention 2: Vitamin E daily<br>N: 84 | Placebo<br>N: 83       | Standardized diet and exercise        | None                                                                                                                                                                                                                                                                                                                        | Low                                                  |
| Wah Kheong, 2017                           | RCT, SC      | Malaysia                                                            | 48 Weeks                    | Silymarin<br>700 mg TID<br>N:49                                                                  | Placebo TID<br>N: 50   | Lifestyle advice                      | NR                                                                                                                                                                                                                                                                                                                          | Low                                                  |
| Younossi, 2019                             | RCT, MC      | 20 Countries                                                        | 78 Weeks (Interim analysis) | Obeticholic acid 25 mg daily<br>N: 308                                                           | Placebo<br>N: 311      | NR                                    | Intervention group:<br>Lipid lowering 160 (52%)<br>Statins 127 (41%)<br>Antidiabetic medication 159 (52%)<br>Thiazolidinediones 4 (1%)<br>Vitamin E 32 (10%)<br><br>Placebo group:<br>Lipid lowering 175 (56%)<br>Statins 144 (46%)<br>Antidiabetic medication 167 (54%)<br>Thiazolidinediones 5 (2%)<br>Vitamin E 42 (14%) | High (Multiple grants from pharmaceutical companies) |
| Zein, 2011                                 | RCT, MC      | USA                                                                 | 52 Weeks                    | Pentoxifylline 400 mg TID<br>N: 26                                                               | Placebo<br>N: 29       | Individualized nutritional counseling | None                                                                                                                                                                                                                                                                                                                        | Low                                                  |

<sup>2</sup> Both studies have same population but reported different outcomes

**Table 2. Patients' characteristics<sup>3</sup>**

| Study, year                          | Intervention                | Age (Mean) | Sex (% male) | Diabetes n, % | NAFLD activity score (Mean) | Fibrosis score (Mean) | Advanced fibrosis n, % | BMI (Mean) | ALT (Mean) | AST (Mean) |
|--------------------------------------|-----------------------------|------------|--------------|---------------|-----------------------------|-----------------------|------------------------|------------|------------|------------|
| Aithal, 2008                         | Pioglitazone                | 52         | 70%          | 0             | NR                          | 1.7                   | 7, 19%                 | 29.8       | 93.6       | NR         |
|                                      | Placebo                     | 55         | 51%          | 0             | NR                          | 2.3                   | 11, 30%                | 30.8       | 84.1       | NR         |
| Armstrong MJ, 2016                   | Liraglutide                 | 50         | 69%          | 9, 35%        | 4.9                         | 2.3                   | 12, 46%                | 34.2       | 77         | 51         |
|                                      | Placebo                     | 52         | 50%          | 8, 31%        | 4.8                         | 2.3                   | 15, 58%                | 37.7       | 66         | 51         |
| Belfort, 2006                        | Pioglitazone                | 51         | 54%          | 26, 100%      | NR                          | 1.75                  | 2, 10%                 | 33.5       | 67         | 47         |
|                                      | Placebo                     | 51         | 33%          | 21, 100%      | NR                          | 1.25                  | 7, 27%                 | 32.9       | 61         | 42         |
| Bril, 2019                           | Vitamin E                   | 60         | 93%          | 36, 100%      | 3.9                         | 1.6                   | NR                     | 33.8       | 53         | 41         |
|                                      | Vitamin E plus pioglitazone | 60         | 81%          | 37, 100%      | 3.7                         | 1.4                   | NR                     | 35.2       | 40         | 32         |
|                                      | Placebo                     | 57         | 93%          | 32, 100%      | 4.2                         | 1.5                   | NR                     | 33.6       | 53         | 40         |
| Cusi, 2016                           | Pioglitazone                | 52         | 72%          | 24, 48%       | 4.5                         | 1.1                   | NR                     | 34.3       | 62         | 47         |
|                                      | Placebo                     | 49         | 69%          | 28, 55%       | 4.5                         | 0.9                   | NR                     | 34.5       | 57         | 43         |
| Harrison, 2018 (a bridging fibrosis) | Simtuzumab 75mg             | 56         | 39%          | 48, 68%       | 4.6                         | 2.8                   | 70, 98.6%              | 34.2       | 47         | 41         |
|                                      | Simtuzumab 125 mg           | 55         | 36%          | 50, 68%       | 4.9                         | 3                     | 74, 100%               | 34.1       | 54         | 41         |
|                                      | Placebo                     | 56         | 35%          | 49, 66%       | 4                           | 3                     | 74, 100%               | 32.7       | 50         | 42         |
| Harrison, 2003                       | Vitamin E plus Vitamin C    | 52         | 39%          | 14, 61%       | 3.1                         | NR                    | 4, 18%                 | 35         | 92         | 63.2       |
|                                      | Placebo                     | 50         | 50%          | 5, 23%        | 3                           | NR                    | 6, 26%                 | 30.8       | 109        | 80.2       |
| Harrison, 2019                       | Resmetirom                  | 51         | 45%          | 36, 43%       | 4.9                         |                       | 18, 21%                | 35.8       | 50         | 35.1       |
|                                      | Placebo                     | 47.3       | 59%          | 13, 32%       | 4.8                         | NR                    | 7, 17%                 | 33.6       | 60.1       | 38         |
| Harrison, 2020 (MSDC-0602K)          | MSDC-0602K dose 62.5 mg     | 56.9       | 43%          | 57,55.6%      | 5.5                         | 2.1                   | 47, 46.5%              | 34.7       | 58.3       | 44.9       |
|                                      | MSDC-0602K dose 125 mg      | 56         | 35%          | 51, 52%       | 5.2                         | 2.1                   | 45, 45.9%              | 35.9       | 50.9       | 42.7       |
|                                      | MSDC-0602K dose 250 mg      | 56.8       | 43%          | 52,51.5%      | 5.4                         | 2                     | 44, 43.6%              | 35         | 59.3       | 46.4       |

<sup>3</sup> Phase 2b NATIVE trial, 2020: Press release. Patients' characteristics and risk of bias assessment could not be abstracted

| Study, year                                  | Intervention                           | Age (Mean) | Sex (% male) | Diabetes n, % | NAFLD activity score (Mean) | Fibrosis score (Mean)                  | Advanced fibrosis n, % | BMI (Mean) | ALT (Mean) | AST (Mean) |
|----------------------------------------------|----------------------------------------|------------|--------------|---------------|-----------------------------|----------------------------------------|------------------------|------------|------------|------------|
|                                              | Placebo                                | 54.6       | 43%          | 50, 50%       | 5.3                         | 2.1                                    | 46, 45.7%              | 35.03      | 58.6       | 42.7       |
| Harrison, 2020 (Aldafermin)                  | Aldafermin                             | 53         | 51%          | 32, 60%       | 5.7                         | NR                                     | 24, 45%                | 35.8       | 73.3       | 54.5       |
|                                              | Placebo                                | 54.1       | 36%          | 16, 64%       | 5.4                         | NR                                     | 10, 40%                | 36.8       | 55.1       | 44.3       |
| Harrison, STELLAR 3 2020 (bridging fibrosis) | Selonsertib 18 mg                      | 59         | 44%          | 224, 70%      | NR                          | -0.2                                   | 322, 100%              | 32.4       | 56         | 48         |
|                                              | Selonsertib 6 mg                       | 59         | 39%          | 223, 69%      | NR                          | -0.13                                  | 321, 100%              | 32.4       | 52         | 46         |
|                                              | Placebo                                | 59         | 52%          | 116, 73%      | NR                          | -0.19                                  | 159, 100%              | 32.2       | 56         | 43         |
| Loomba, 2018                                 | Selonsertib 18 mg daily +\- Simtuzumab | 55         | 31%          | 21, 66%       | NR                          | NR                                     | 21, 66%                | 33         | 69         | 48         |
|                                              | Simtuzumab                             | 57         | 40%          | 8, 80%        | NR                          | NR                                     | 6, 60%                 | 37         | 61         | 56         |
| McPherson, 2017                              | Losartan                               | 58         | 54.1%        | 15,62.50%     | 5.5                         | 2.07                                   | 5/15, 33%              | 32.8       | 52.5       | 35         |
|                                              | Placebo                                | 45         | 57.1%        | 12,57.14%     | 5.5                         | 2.41                                   | 8/17, 47%              | 34.1       | 65         | 46         |
| Navarro, 2019                                | Silymarin                              | 48.2       | 67 %         | 14 (27%)      | 4.4                         | 1.4                                    | 19%                    | 33.5       | 61         | 46         |
|                                              | Placebo                                | 49.5       | 56%          | 7 (28%)       | 4.4                         | 1                                      | 16%                    | 33.4       | 65         | 51         |
| Neuschwander-Tetri, 2015                     | Obeticholic acid                       | 52         | 30%          | 75, 53%       | 5.3                         | 1.9                                    | NR                     | 35         | 83         | 64         |
|                                              | Placebo                                | 51         | 37%          | 74, 52%       | 5.1                         | 1.8                                    | NR                     | 34         | 82         | 58         |
| Newsome, 2020                                | Semaglutide                            | 54.3       | 43%          | 49, 60%       | 4.8                         | Enhanced liver fibrosis test score 9.9 | 42, 51%                | 35.2       | 54         | 44         |
|                                              | Placebo                                | 52.4       | 45%          | 50, 62%       | 4.9                         | 9.6                                    | 36, 45%                | 36.1       | 55         | 42         |
| Loomba (Phase 2b ATLAS trial), 2020          | Cilofexor                              | 59         | 27%          | 27, 68%       | NR                          | NR                                     | 39, 98%                | 32         | 50         | 49         |
|                                              | Firsocostat                            | 63         | 37%          | 30, 75%       | NR                          | NR                                     | 38, 95%                | 33         | 47         | 41         |
|                                              | Selonsertib                            | 60         | 38%          | 26, 67%       | NR                          | NR                                     | 39, 100%               | 32         | 42         | 44         |
|                                              | Cilofexor & Selonsertib                | 61         | 34%          | 58, 75%       | NR                          | NR                                     | 75, 98%                | 33         | 45         | 41         |
|                                              | Firsocostat & Selonsertib              | 59         | 38%          | 57, 72%       | NR                          | NR                                     | 78, 99%                | 35         | 43         | 44         |
|                                              | Cilofexor & Firsocostat                | 62         | 38%          | 57, 73%       | NR                          | NR                                     | 76, 98%                | 34         | 42         | 46         |
|                                              | Placebo                                | 59         | 31%          | 27, 69%       | NR                          | NR                                     | 39, 100%               | 35         | 44         | 41         |
| Ratziu, 2008                                 | Rosiglitazone                          | 53         | 19%          | 9, 28%        | 4                           | NR                                     | 5, 16%                 | 31.5       | 69         | 46         |
|                                              | Placebo                                | 54         | 18%          | 11, 35%       | 3                           | NR                                     | 15, 48%                | 30.5       | 84         | 61         |
| Ratziu 2016                                  | Elafibranor 80 mg                      | 52.7       | 53%          | 37, 40%       | 5                           | 1.5                                    | 23, 24.7%              | 31.8       | 60.7       | 40.9       |

| Study, year                    | Intervention       | Age (Mean) | Sex (% male) | Diabetes n, %                                   | NAFLD activity score (Mean) | Fibrosis score (Mean) | Advanced fibrosis n, % | BMI (Mean) | ALT (Mean) | AST (Mean) |
|--------------------------------|--------------------|------------|--------------|-------------------------------------------------|-----------------------------|-----------------------|------------------------|------------|------------|------------|
|                                | Elafibranor 120 mg | 52.4       | 53%          | 37, 42%                                         | 4.9                         | 1.7                   | 20, 22.5%              | 31         | 63.8       | 41.7       |
|                                | Placebo            | 52.4       | 60%          | 33, 36%                                         | 5                           | 1.5                   | 20, 21.7%              | 30.9       | 63.8       | 44.5       |
| Ratziu 2018                    | Aramchol           | 53.9       | 35%          | All patients are either prediabetic or diabetic | 5.06                        | NR                    | 47.5%                  | 32.4       | 68.1       | NR         |
|                                | Aramchol           | 54.9       | 35%          |                                                 | 5.21                        | NR                    | 36.7%                  | 33         | 55.9       | NR         |
|                                | Placebo            | 54.4       | 47.9%        |                                                 | 5.06                        | NR                    | 33%                    | 32.6       | 67.7       | NR         |
| Ratziu, 2020<br>Friedman, 2018 | CENICRIVIROC       | 54.9       | 55.4%        | 73, 60%                                         | ≥5: 85 (70.2%)              | 2                     | 46, 38%                | 33.32      | 58.9       | 42.49      |
|                                | Placebo            | 52         | 48.3%        | 25, 41.7%                                       | ≥5: 45 (75.0%)              | 2.1                   | 24, 40%                | 34.47      | 64.15      | 47.04      |
| Sanyal, 2010 (PIVENS)          | Pioglitazone       | 47         | 38%          | 0                                               | 5.1                         | 1.4                   | NR                     | 34         | 82         | 54         |
|                                | Vitamin E          | 46.6       | 38%          | 0                                               | 5.1                         | 1.5                   | NR                     | 34         | 86         | 59         |
|                                | Placebo            | 45         | 42%          | 0                                               | 4.8                         | 1.6                   | NR                     | 35         | 81         | 55         |
| Wah Kheong, 2017               | Silymarin          | 49.6       | 49%          | 23, 46.9%                                       | 5                           | 1                     | 14, 28.6%              | 30         | 88         | 52         |
|                                | Placebo            | 50.1       | 44%          | 30, 60%                                         | 5                           | 1                     | 10, 20%                | 31         | 73         | 46         |
| Younossi, 2019                 | Obeticholic acid   | 55         | 43%          | 171, 56%                                        | NAS ≥6: 68%                 | NR                    | NR                     | NR         | 80.2       | 57.0       |
|                                | Placebo            | 55         | 40%          | 175, 56%                                        | NAS ≥6: 70%                 | NR                    | NR                     |            | 79.6       | 58.9       |
| Zein, 2011                     | Pentoxifylline     | 50.5       | 69.2%        | 1, 3.8%                                         | 5.7                         | NR                    | 5, 19.2%               | 32.9       | 81.5       | 58         |
|                                | Placebo            | 49.6       | 69%          | 4, 13.8%                                        | 5.4                         | NR                    | 9, 31%                 | 34         | 55         | 43         |
